# Supplementary material for: The effect of mountain uplift on eastern boundary currents and upwelling systems
Source: Copernicus journal article supplement (doi:10.5194/cp-16-161-2020), 2020-01-22
Supplement: Supplementary file 1 [file cp-16-161-2020-supplement.pdf]

Supplement of Clim. Past, 16, 161–181, 2020  
<https://doi.org/10.5194/cp-16-161-2020-supplement>  
© Author(s) 2020. This work is distributed under  
the Creative Commons Attribution 4.0 License.

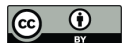

*Supplement of*

## **The effect of mountain uplift on eastern boundary currents and upwelling systems**

**Gerlinde Jung and Matthias Prange**

*Correspondence to:* Gerlinde Jung (gjung.sc@gmail.com)

The copyright of individual parts of the supplement might differ from the CC BY 4.0 License.

1) Evaluation of upwelling velocities - control run (CTRL)

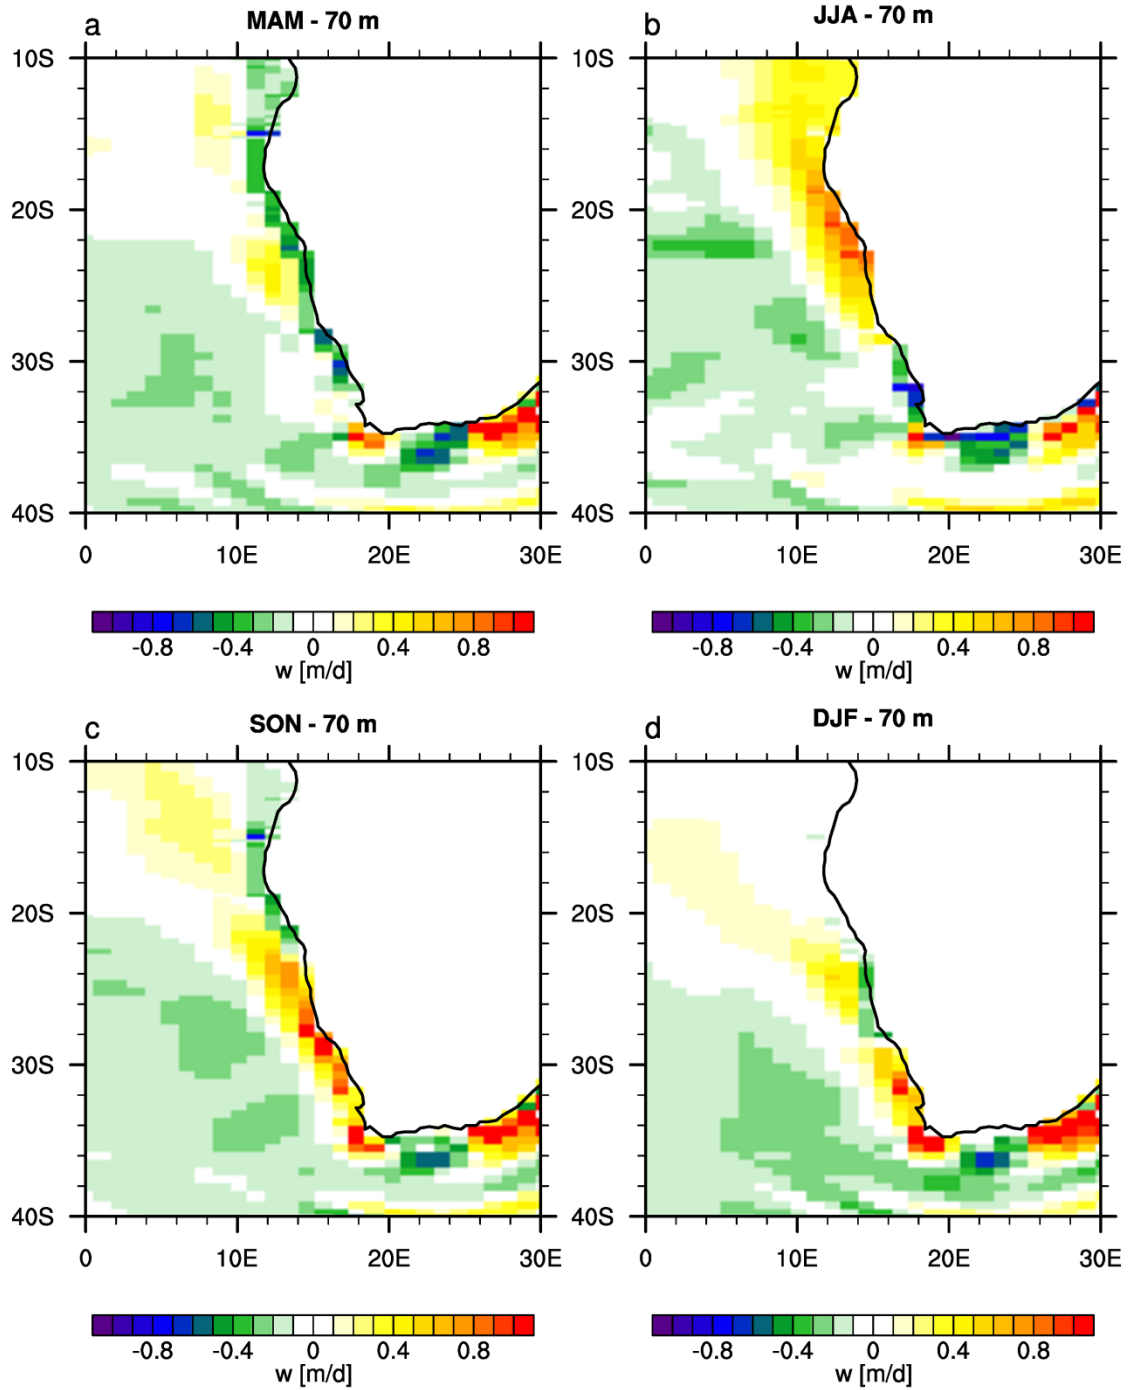

**S1: Seasonal mean vertical velocity [ $\text{m d}^{-1}$ ] at a depth of 70m in the control run (CTRL) for MAM (a), JJA (b), SON (c), DJF (d). Positive (negative) values denote upward (downward) motion.**

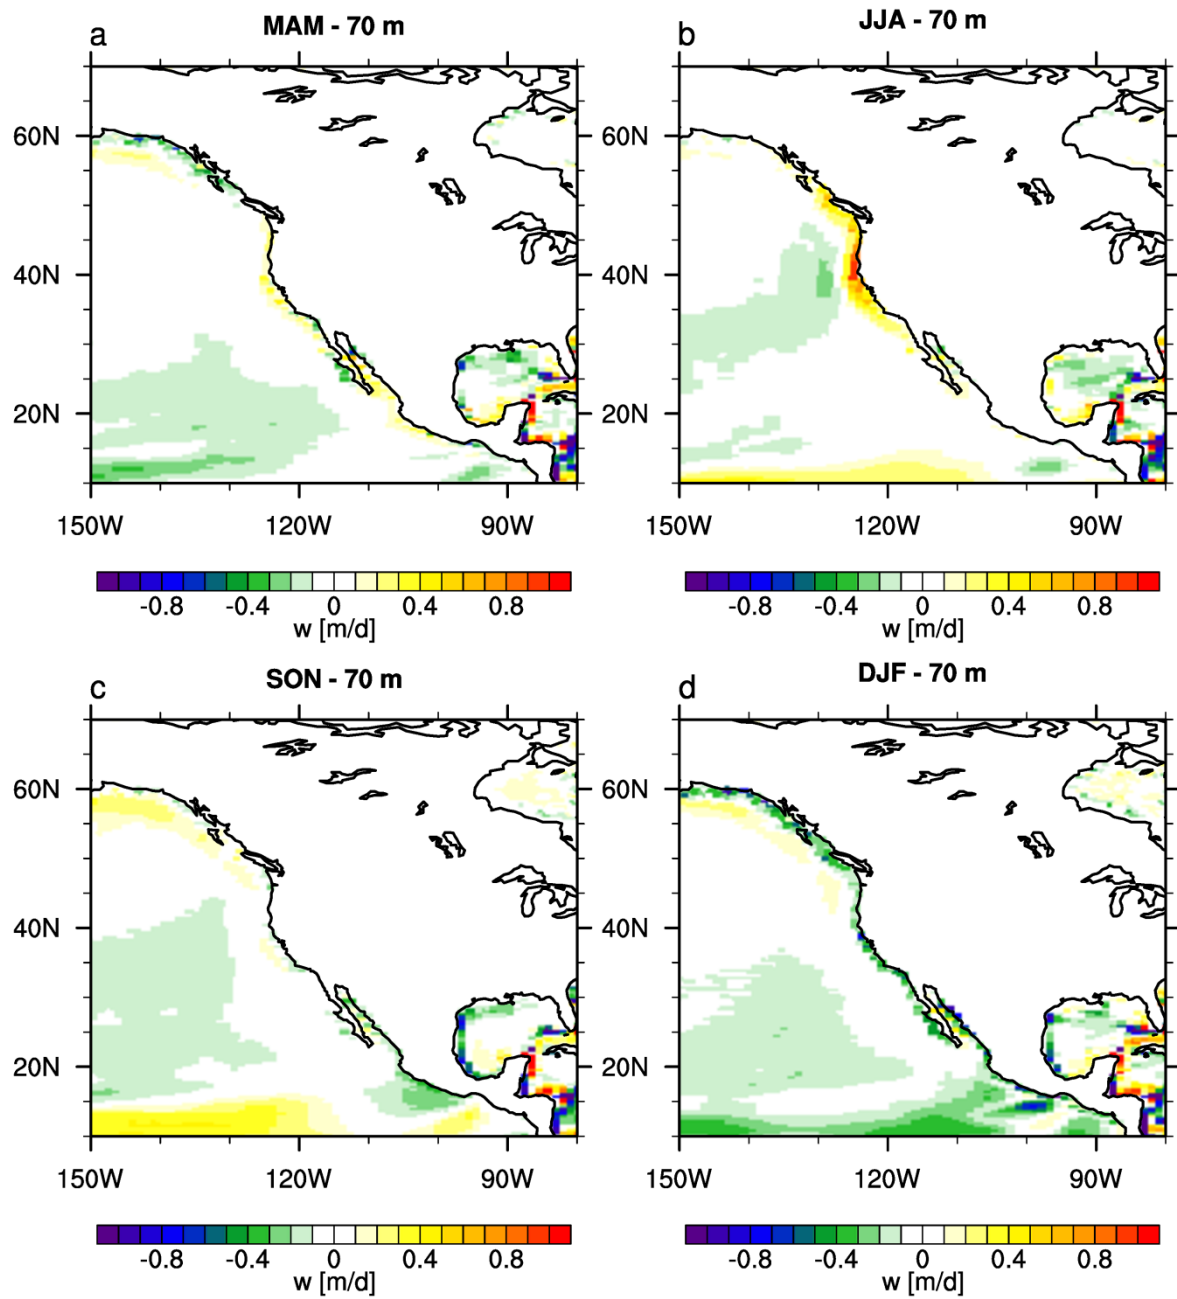

**S2: Seasonal mean vertical velocity [ $\text{m d}^{-1}$ ] at a depth of 70m in the control run (CTRL) for MAM (a), JJA (b), SON (c), DJF (d). Positive (negative) values denote upward (downward) motion.**

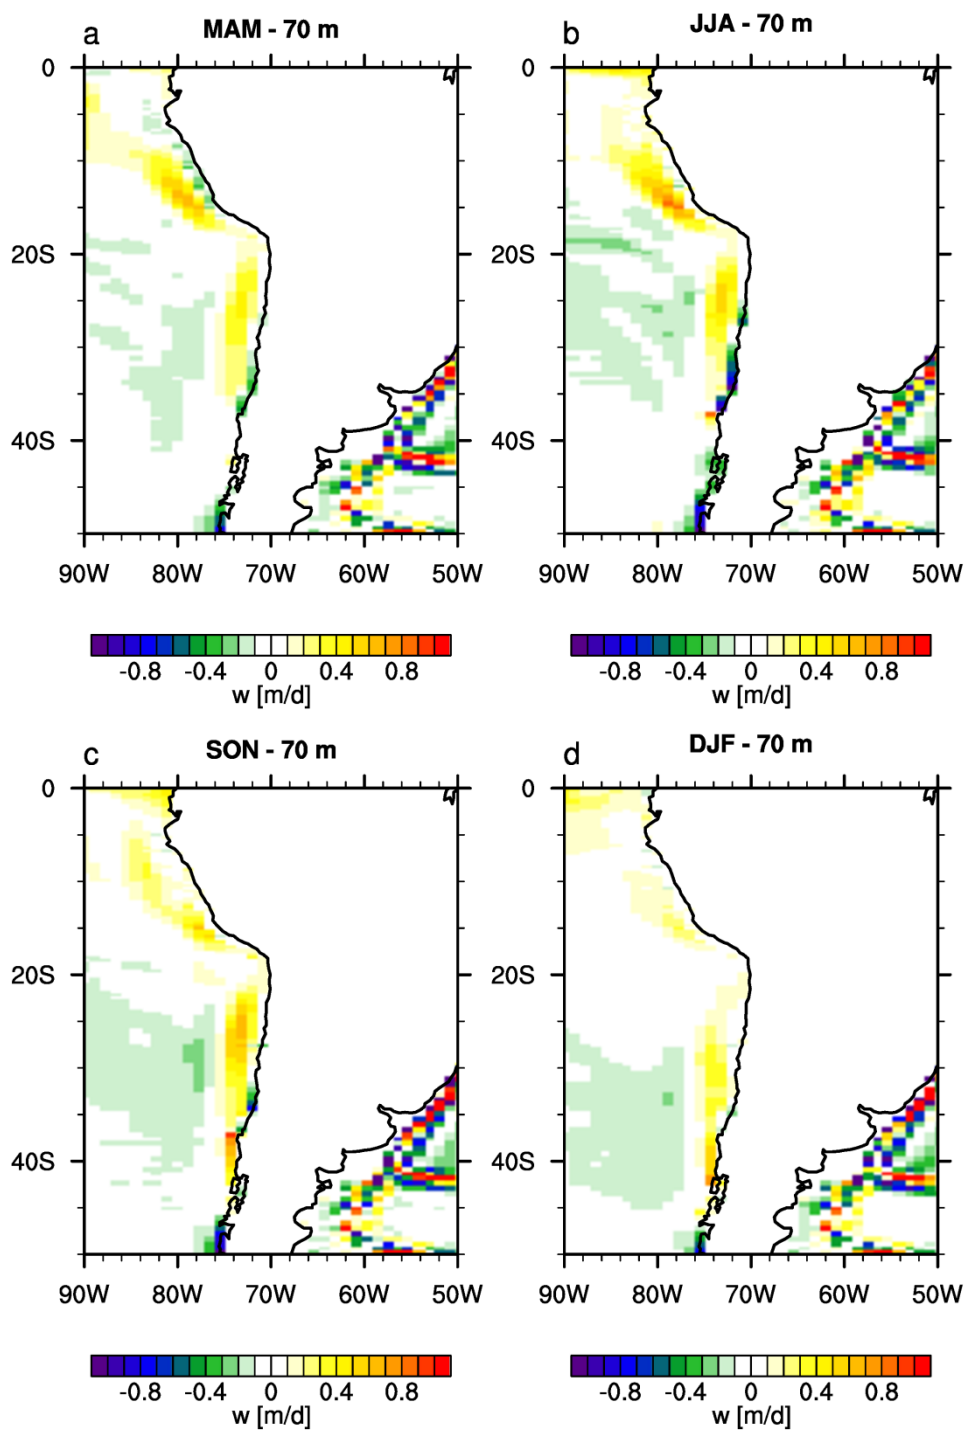

**S3: Seasonal mean vertical velocity [ $\text{m d}^{-1}$ ] at a depth of 70m in the control run (CTRL) for MAM (a), JJA (b), SON (c), DJF (d). Positive (negative) values denote upward (downward) motion.**

## 2) Evaluation of upwelling velocities – Carton-Giese SODA 2.2.4 reanalysis

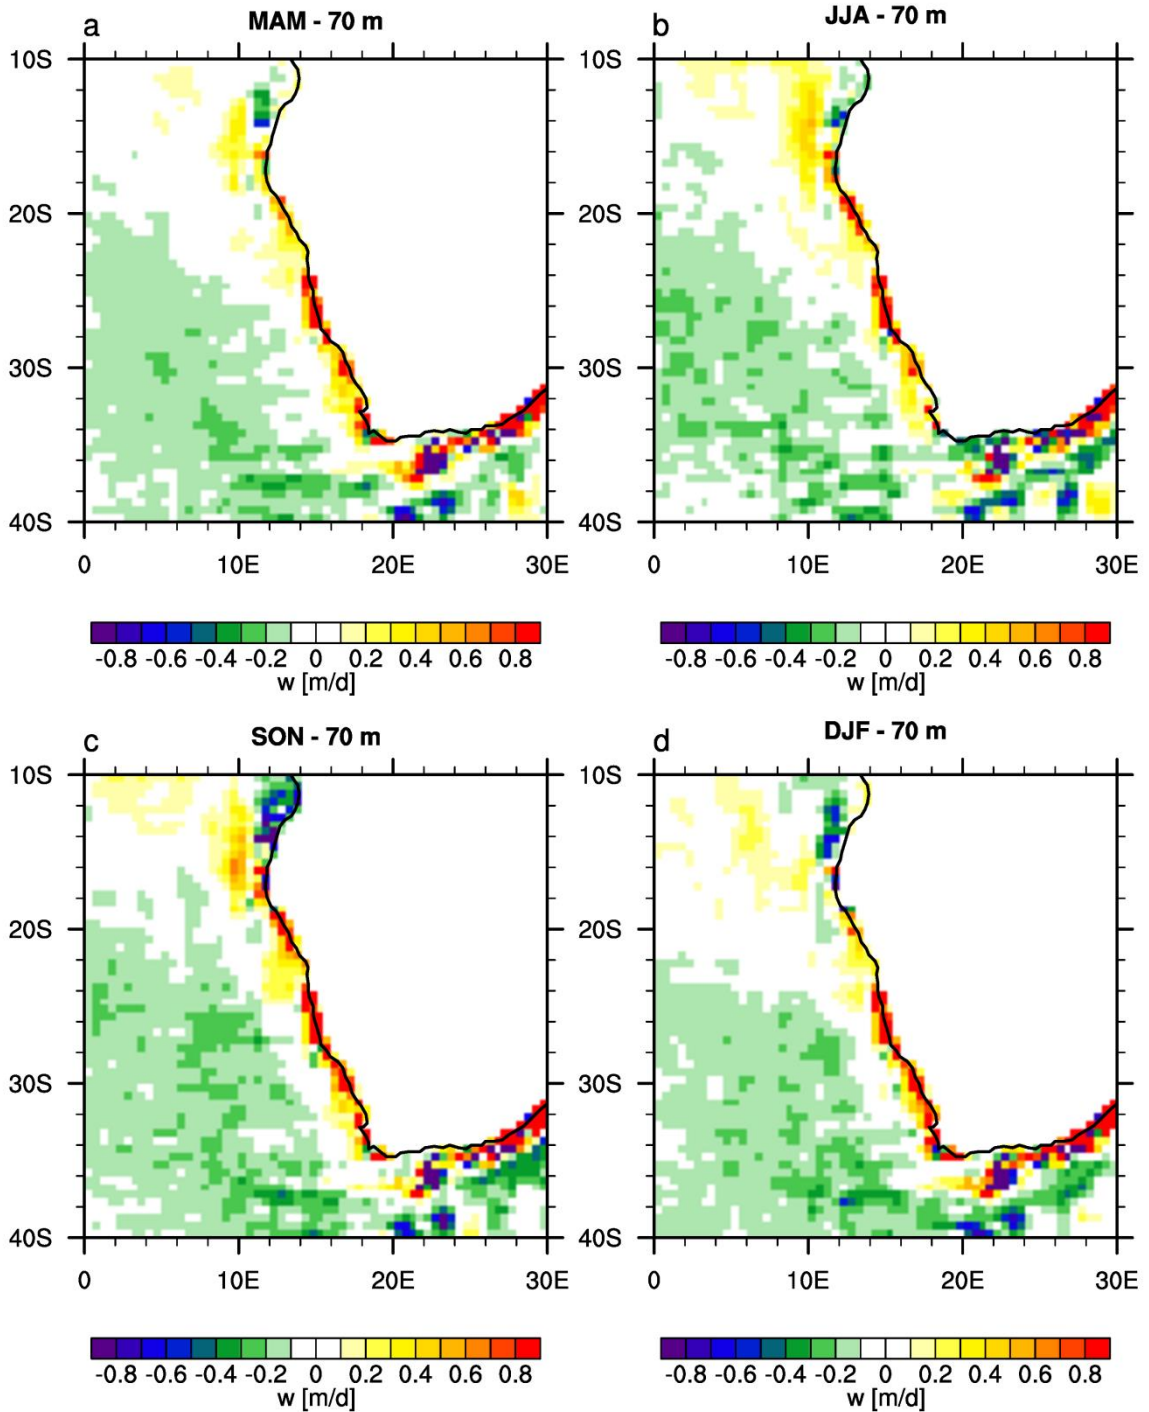

**S4:** 30-year seasonal averages (1979-2008) of vertical velocity [ $\text{m d}^{-1}$ ] at a depth of 70m from Carton-Giese SODA 2.2.4 reanalysis for MAM (a), JJA (b), SON (c), DJF (d). Positive (negative) values denote upward (downward) motion.

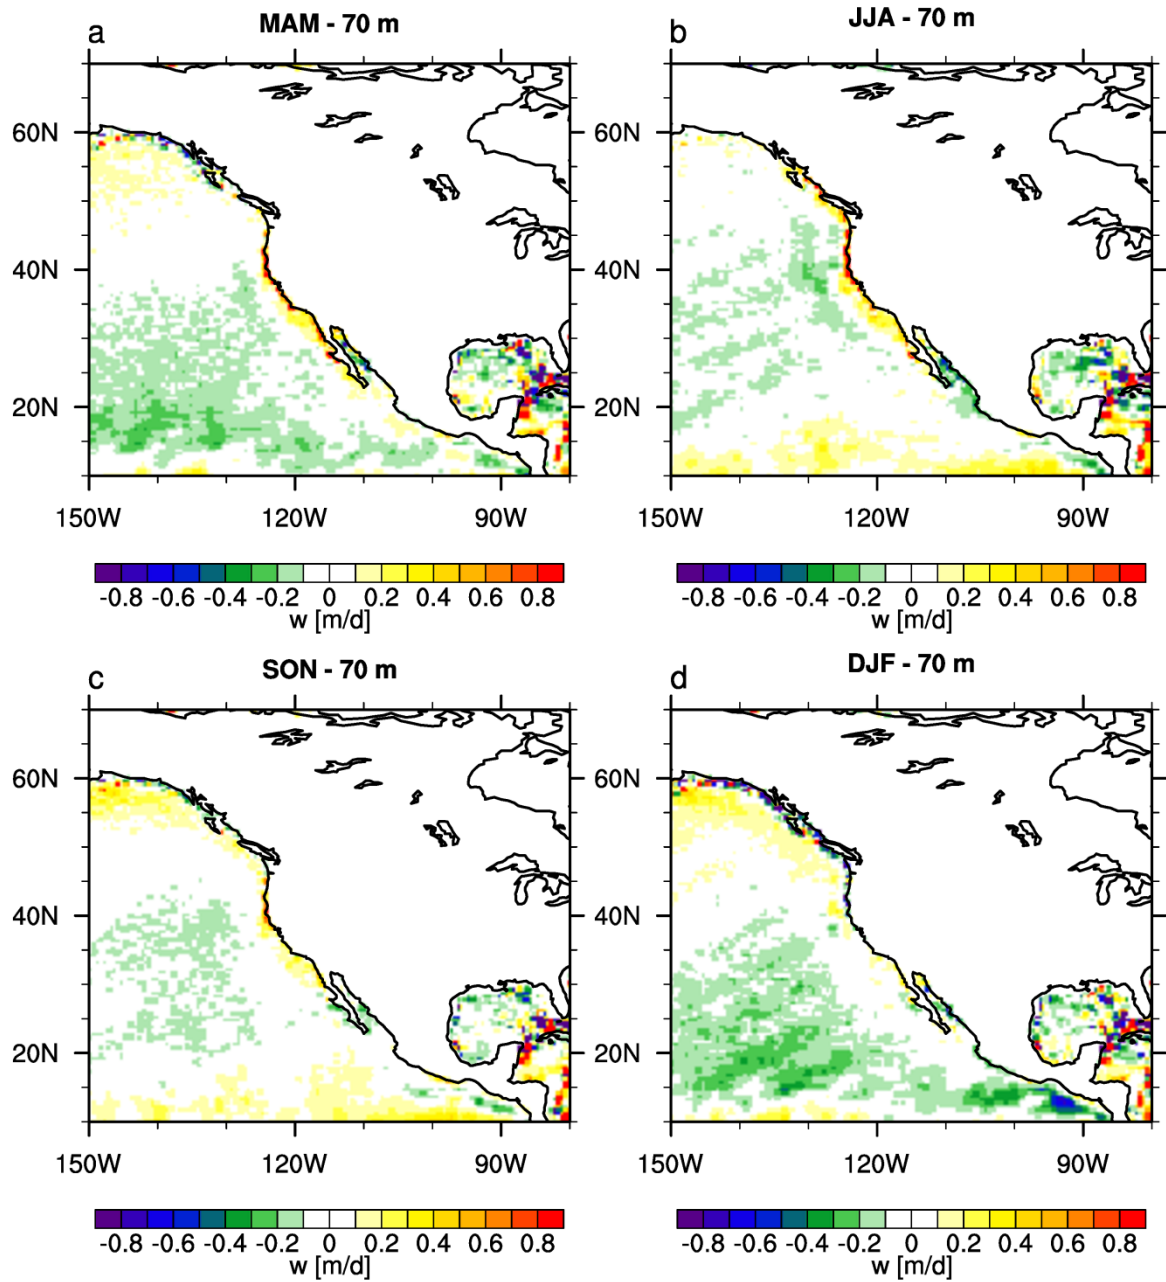

**S5:** 30-year seasonal averages (1979-2008) of vertical velocity [ $\text{m d}^{-1}$ ] at a depth of 70m from Carton-Giese SODA 2.2.4 reanalysis for MAM (a), JJA (b), SON (c), DJF (d). Positive (negative) values denote upward (downward) motion.

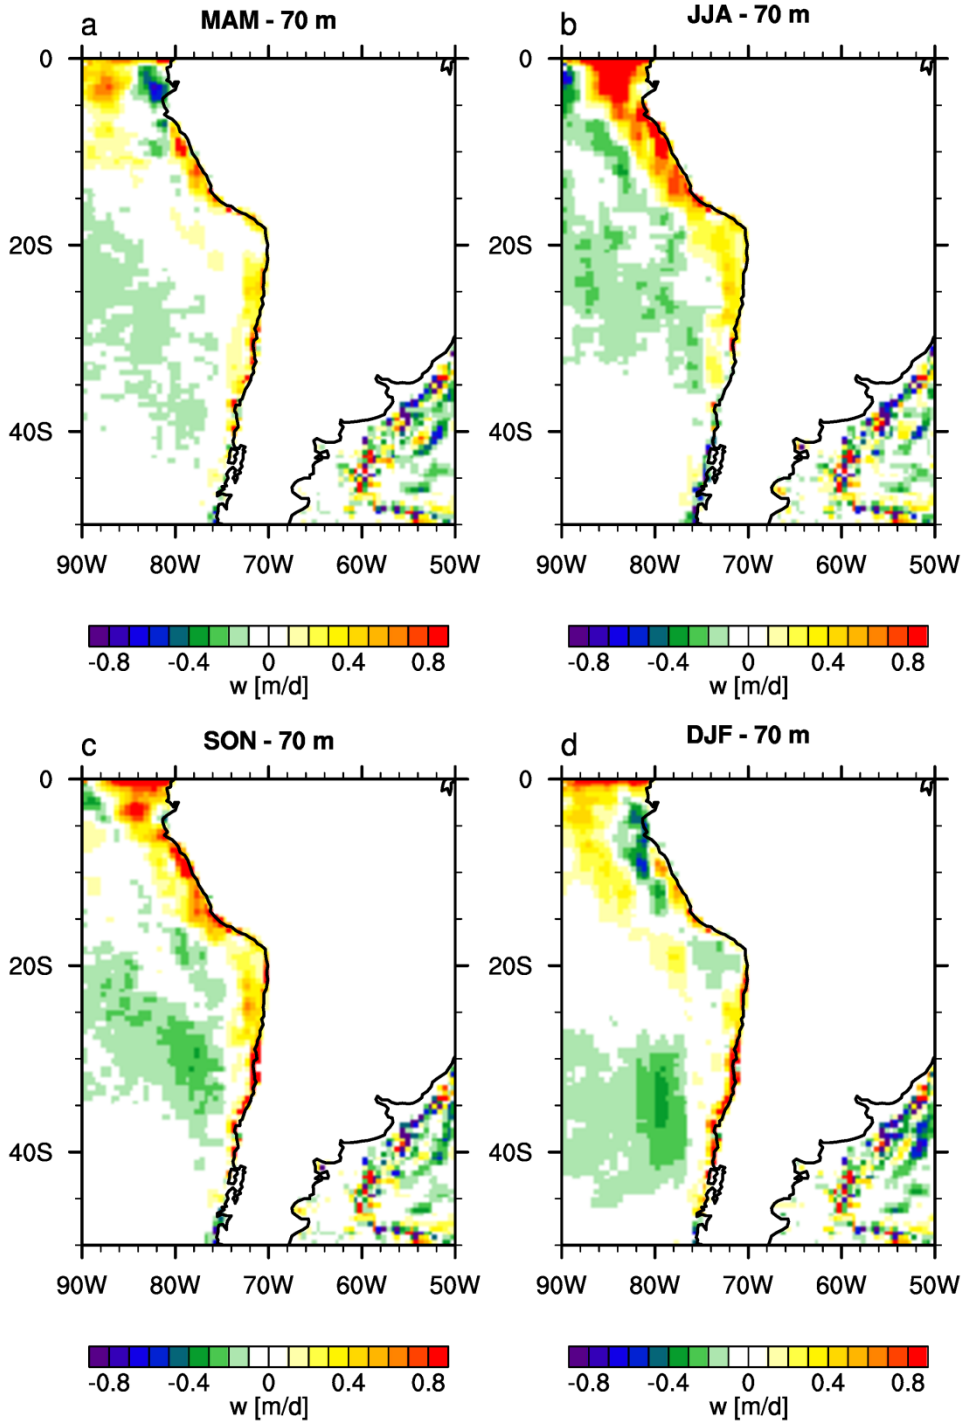

**S6: 30-year seasonal averages (1979-2008) of vertical velocity [m d<sup>-1</sup>] at a depth of 70m from Carton-Giese SODA 2.2.4 reanalysis for MAM (a), JJA (b), SON (c), DJF (d). Positive (negative) values denote upward (downward) motion.**



### 3) Shortwave and longwave contributions to the cloud-radiation feedback

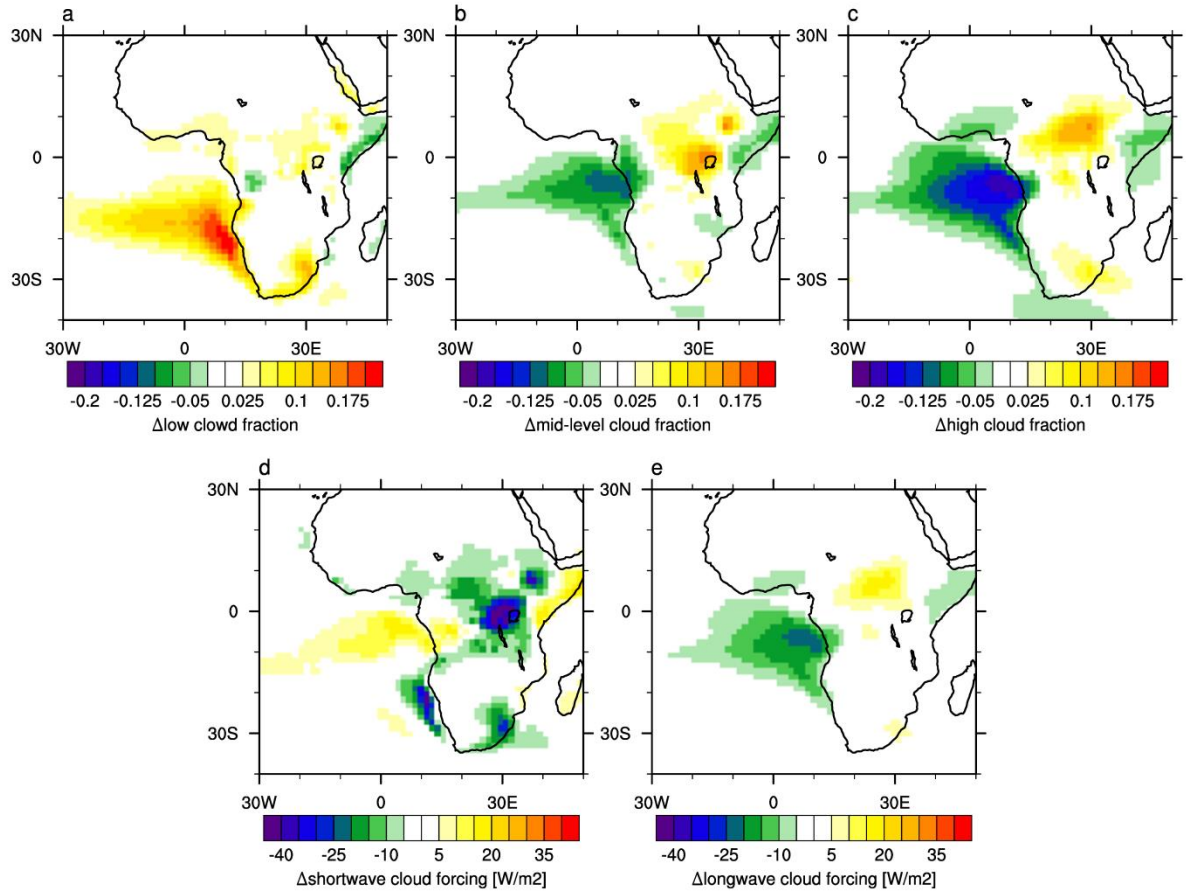

**S7: Annual mean responses in low (a), mid-level (b) and high (c) cloud fraction, and in shortwave (d) and longwave (e) cloud forcing [ $\text{W/m}^2$ ] to African mountain uplift (CTRL – AF).**



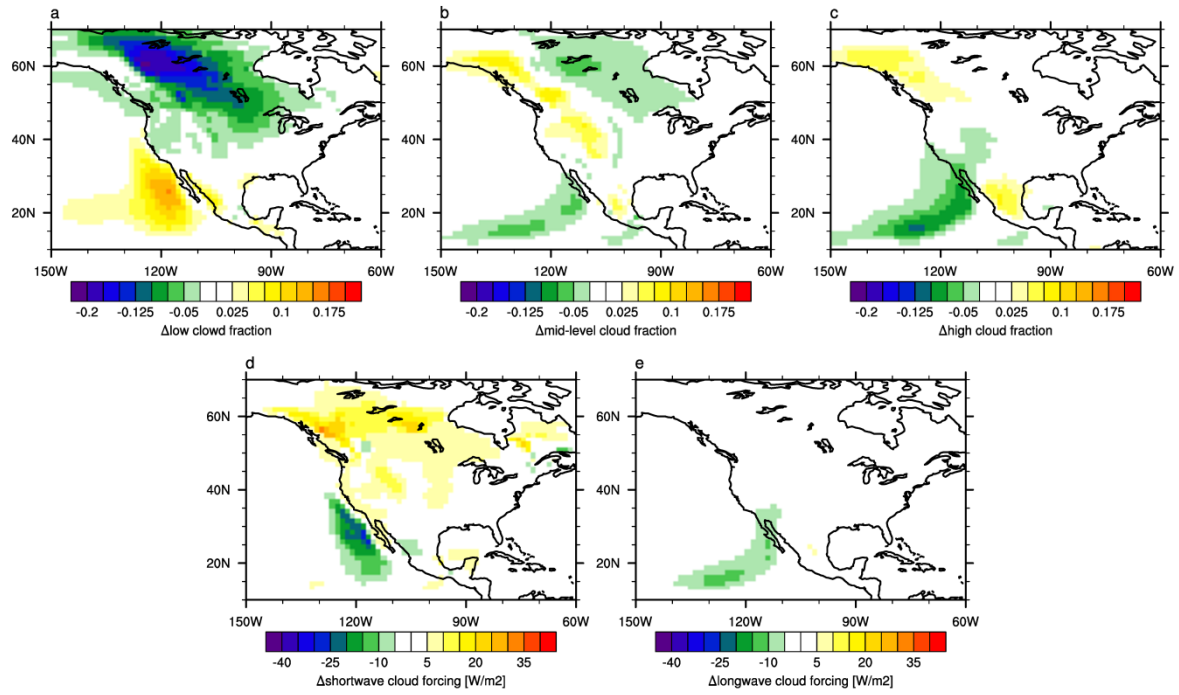

**S8: Annual mean responses in low (a), mid-level (b) and high (c) cloud fraction, and in shortwave (d) and longwave (e) cloud forcing [W/m<sup>2</sup>] to North American mountain uplift (CTRL – NA).**

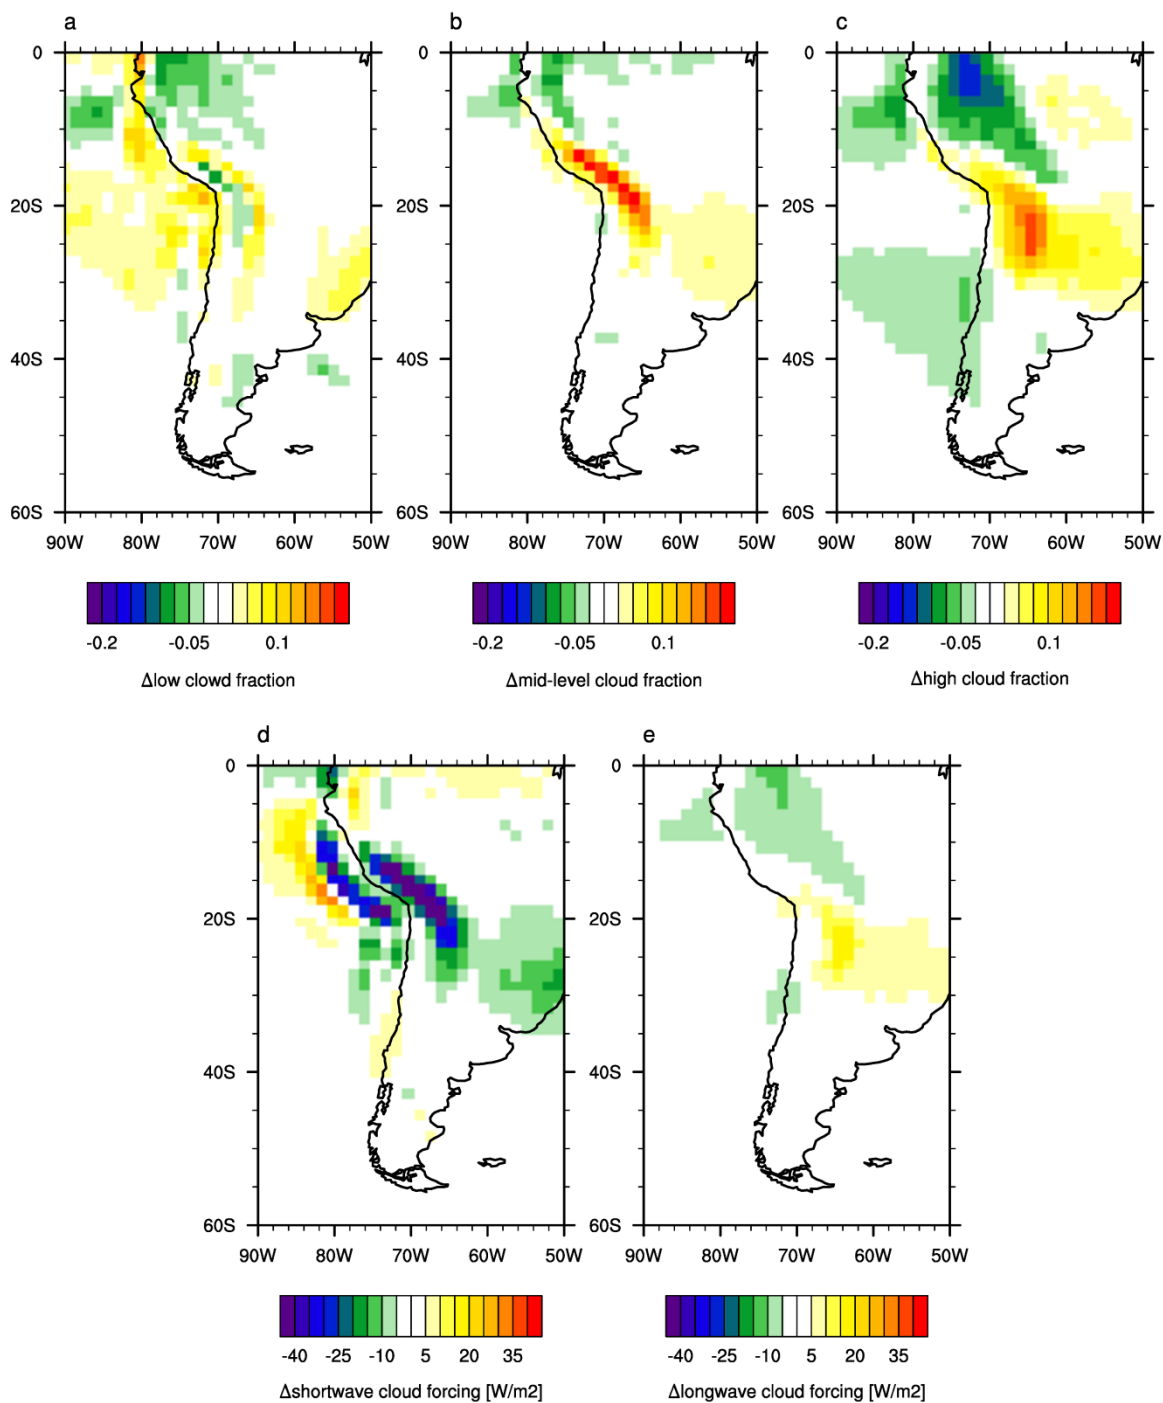

**S9: Annual mean responses in low (a), mid-level (b) and high (c) cloud fraction, and in shortwave (d) and longwave (e) cloud forcing [W/m<sup>2</sup>] to Andean uplift (CTRL – AND).**
